# Supplementary material
Source: publisher figshare collection journal article supplement (https://diabetesjournals.figshare.com/articles/dataset/_/12808301)
Supplement: Supplementary file 1 [file 1]

Supplemental table 1: a) DPV analyses for area level income and education [2 deprivation domains within the GIMD] b) T1DX analyses with each individual component of SES score (parental education, parental income, and insurance status) as well as minority status.

| <b>a) DPV</b>                      | <b>Pump use (%)*</b> |                  |                                | <b>CGM use (%)*</b> |                  |                                    | <b>HbA1c (%)**</b> |                  |                                    |
|------------------------------------|----------------------|------------------|--------------------------------|---------------------|------------------|------------------------------------|--------------------|------------------|------------------------------------|
|                                    | <b>2010-2012</b>     | <b>2016-2018</b> | <b>2010-12 vs.<br/>2016-18</b> | <b>2010-2012</b>    | <b>2016-2018</b> | <b>2010-12<br/>vs.<br/>2016-18</b> | <b>2010-2012</b>   | <b>2016-2018</b> | <b>2010-12<br/>vs.<br/>2016-18</b> |
| <b>Income deprivation</b>          |                      |                  |                                |                     |                  |                                    |                    |                  |                                    |
| <b>Q1</b>                          | 54.1 (51.1-57.0)     | 66.9 (64.5-69.2) |                                | 5.6 (4.6 -6.7)      | 49.6 (46.8-52.5) |                                    | 8.02 (7.94-8.09)   | 7.88 (7.81-7.95) |                                    |
| <b>Q2</b>                          | 52.9 (50.8-55.0)     | 67.3 (65.5-69.0) |                                | 4.4 (3.7- 5.1)      | 54.6 (52.6-56.6) |                                    | 7.96 (7.91-8.01)   | 7.86 (7.81-7.90) |                                    |
| <b>Q3</b>                          | 57.4 (55.6-59.2)     | 70.2 (68.7-71.6) |                                | 5.3 (4.7- 6.0)      | 49.5 (47.8-51.2) |                                    | 7.85 (7.81-7.90)   | 7.73 (7.68-7.77) |                                    |
| <b>Q4</b>                          | 57.0 (55.2-58.8)     | 70.8 (69.3-72.2) |                                | 3.2 (2.8-3.8)       | 50.8 (49.0-52.5) |                                    | 7.74 (7.70-7.78)   | 7.55 (7.51-7.60) |                                    |
| <b>Q5</b>                          | 48.4 (46.7-50.1)     | 63.9 (62.5-65.4) |                                | 3.5 (3.0-4.0)       | 55.6 (54.1-57.1) |                                    | 7.59 (7.54-7.63)   | 7.52 (7.48-7.56) |                                    |
| p-value                            | <0.001               | 0.006            | 0.126                          | <0.001              | <0.001           | <0.001                             | <0.001             | <0.001           | 0.265                              |
| <b>Education deprivation</b>       |                      |                  |                                |                     |                  |                                    |                    |                  |                                    |
| <b>Q1</b>                          | 51.7 (49.7-53.7)     | 66.0 (64.4-67.7) |                                | 3.2 (2.7-3.8)       | 47.0 (45.3-48.8) |                                    | 7.74 (7.69-7.79)   | 7.59 (7.54-7.63) |                                    |
| <b>Q2</b>                          | 49.6 (47.6-51.6)     | 66.4 (64.7-68.0) |                                | 3.5 (2.9-4.1)       | 46.6 (44.8-48.5) |                                    | 7.79 (7.74-7.84)   | 7.60 (7.55-7.65) |                                    |
| <b>Q3</b>                          | 53.3 (51.5-55.1)     | 68.6 (67.1-70.0) |                                | 4.5 (3.9-5.2)       | 53.9 (52.2-55.5) |                                    | 7.76 (7.71-7.80)   | 7.60 (7.56-7.64) |                                    |
| <b>Q4</b>                          | 57.4 (55.7-59.0)     | 69.4 (68.0-70.7) |                                | 4.4 (3.9-5.0)       | 59.1 (57.5-60.6) |                                    | 7.79 (7.75-7.83)   | 7.77 (7.73-7.81) |                                    |
| <b>Q5</b>                          | 54.1 (50.8-57.4)     | 65.6 (62.8-68.4) |                                | 6.3 (5.2-7.6)       | 52.2 (48.8-55.5) |                                    | 7.84 (7.75-7.92)   | 7.72 (7.64-7.79) |                                    |
| p-value                            | <0.001               | 0.008            | 0.004                          | <0.001              | <0.001           | 0.115                              | 0.036              | <0.001           | <0.001                             |
| <b>Minority status<sup>‡</sup></b> |                      |                  |                                |                     |                  |                                    |                    |                  |                                    |
| <b>No</b>                          | 59.0 (57.8-60.1)     | 71.9 (70.9-72.8) |                                | 4.9 (4.5-5.3)       | 56.6 (55.4-57.7) |                                    | 7.69 (7.67-7.72)   | 7.57 (7.54-7.59) |                                    |
| <b>yes</b>                         | 47.1 (45.2-49.0)     | 63.4 (61.9-64.9) |                                | 3.7 (3.2-4.4)       | 47.5 (45.9-49.1) |                                    | 7.91 (7.86-7.95)   | 7.81 (7.77-7.85) |                                    |
| p-value                            | <0.001               | <0.001           | 0.052                          | 0.003               | <0.001           | 0.376                              | <0.001             | <0.001           | 0.333                              |

| <b>b) T1DX</b>                     | <b>Pump use (%)*</b> |                  |                           | <b>CGM use (%)*</b> |                   |                           | <b>HbA1c (%)**</b> |                  |                           |
|------------------------------------|----------------------|------------------|---------------------------|---------------------|-------------------|---------------------------|--------------------|------------------|---------------------------|
|                                    | <b>2010-2012</b>     | <b>2016-2018</b> | 2010-12<br>vs.<br>2016-18 | <b>2010-2012</b>    | <b>2016-2018</b>  | 2010-12<br>vs.<br>2016-18 | <b>2010-2012</b>   | <b>2016-2018</b> | 2010-12<br>vs.<br>2016-18 |
| <b>Income</b>                      |                      |                  |                           |                     |                   |                           |                    |                  |                           |
| ≥ \$100,000                        | 66.7 (64.1-69.2)     | 71.9 (69.3-74.4) |                           | 9.1 (7.8-10.6)      | 49.1 (45.7-52.5)  |                           | 7.98 (7.90-8.06)   | 8.17 (8.09-8.25) |                           |
| \$75,000 –<br><\$100,000           | 56.1 (52.7-59.5)     | 65.9 (62.4-69.2) |                           | 6.8 (5.4-8.5)       | 40.7 (36.7-44.9)  |                           | 8.27 (8.17-8.36)   | 8.41 (8.31-8.51) |                           |
| \$50,000 – <<br>\$75,000           | 52.8 (49.4-56.1)     | 57.6 (54.1-61.0) |                           | 4.8 (3.7-6.3)       | 32.2 (28.5-36.2)  |                           | 8.43 (8.34-8.53)   | 8.72 (8.62-8.82) |                           |
| \$35,000 – <<br>\$50,000           | 41.2 (37.6-45.0)     | 45.7 (42.0-49.4) |                           | 4.0 (2.8-5.6)       | 21.8 (18.4-25.6)  |                           | 8.76 (8.65-8.87)   | 9.08 (8.97-9.19) |                           |
| \$25,000 –<br>\$35,000             | 32.5 (28.9-36.2)     | 43.1 (39.1-47.2) |                           | 4.2 (2.8-6.0)       | 17.3 (14.2-21.0)  |                           | 8.96 (8.84-9.07)   | 9.31 (9.19-9.43) |                           |
| < \$25,000                         | 26.5 (23.7-29.6)     | 30.7 (27.6-34.0) |                           | 3.5 (2.4-5.0)       | 12.3 (10.0-15.0)  |                           | 9.08 (8.98-9.18)   | 9.42 (9.32-9.53) |                           |
| p-value                            | <0.001               | <0.001           | 0.808                     | <0.001              | <0.001            | <0.001                    | <0.001             | <0.001           | 0.004                     |
| <b>Education</b>                   |                      |                  |                           |                     |                   |                           |                    |                  |                           |
| Professional or<br>Doctoral degree | 66.3 (61.6-70.7)     | 74.3 (69.5-78.6) |                           | 11.1 (8.6-14.2)     | 53.9 (48.2-59.5)  |                           | 7.82 (7.69-7.96)   | 7.93 (7.78-8.08) |                           |
| Master's<br>degree                 | 64.4 (61.4-67.4)     | 69.4 (66.2-72.5) |                           | 9.3 (7.7-11.1)      | 43.0 (39.2-47.0)  |                           | 8.02 (7.93-8.11)   | 8.13 (8.03-8.23) |                           |
| Bachelor's<br>degree               | 57.8 (55.3-60.2)     | 62.9 (60.3-65.4) |                           | 6.4 (5.5-7.6)       | 39.3 (36.3-42.4)  |                           | 8.24 (8.17-8.31)   | 8.48 (8.40-8.56) |                           |
| Associate's<br>degree              | 45.6 (42.4-48.9)     | 51.5 (48.0-55.0) |                           | 5.3 (4.1-6.8)       | 27.7 (24.4-31.3)  |                           | 8.70 (8.60-8.79)   | 9.05 (8.95-9.15) |                           |
| High school<br>graduate or GED     | 34.9 (32.9-37.0)     | 41.4 (39.2-43.7) |                           | 2.9 (2.3-3.6)       | 19.3 (17.3-21.4)  |                           | 8.85 (8.78-8.91)   | 9.19 (9.12-9.26) |                           |
| Less than a high<br>school diploma | 20.6 (16.6-25.3)     | 41.9 (38.5-45.4) |                           | 3.1 (1.6-6.0)       | 21.6 (18.4- 25.2) |                           | 8.96 (8.80-9.13)   | 8.94 (8.83-9.04) |                           |
| p-value                            | <0.001               | <0.001           | 0.020                     | <0.001              | <0.001            | 0.639                     | <0.001             | <0.001           | 0.265                     |
| <b>Insurance</b>                   |                      |                  |                           |                     |                   |                           |                    |                  |                           |
| Private                            | 56.9 (55.1-58.7)     | 62.3 (60.4-64.2) |                           | 6.8 (6.1-7.6)       | 39.8 (37.5-42.1)  |                           | 8.24 (8.18-8.29)   | 8.46 (8.40-8.51) |                           |
| Public                             | 33.2 (31.2-35.3)     | 40.3 (38.1-42.6) |                           | 3.8 (3.1-4.6)       | 17.6 (15.8-19.6)  |                           | 8.91 (8.85-8.98)   | 9.24 (9.18-9.31) |                           |
| None                               | 24.0 (14.7-36.6)     | 59.8 (49.0-69.7) |                           | 1.8 (0.2-11.9)      | 21.5 (13.1-33.1)  |                           | 8.52 (8.12-8.91)   | 8.82 (8.51-9.14) |                           |
| p-value                            | <0.001               | <0.001           | <0.001                    | <0.001              | <0.001            | 0.004                     | <0.001             | <0.001           | 0.359                     |
| <b>Minority status<sup>‡</sup></b> |                      |                  |                           |                     |                   |                           |                    |                  |                           |
| No                                 | 58.0 (56.4-59.5)     | 65.1 (63.4-66.6) |                           | 6.2 (5.6-6.9)       | 38.4 (36.5-40.4)  |                           | 8.24 (8.20-8.28)   | 8.42 (8.37-8.46) |                           |
| yes                                | 44.5 (41.9-47.2)     | 52.4 (49.6-55.1) |                           | 6.2 (5.1-7.6)       | 27.7 (25.1-30.5)  |                           | 8.48 (8.41-8.55)   | 8.86 (8.78-8.94) |                           |
| p-value                            | <0.001               | <0.001           | 0.855                     | 0.972               | <0.001            | <0.001                    | <0.001             | <0.001           | <0.001                    |

\*Logistic /\*\* linear regression models including income or education or insurance, and period, sex, age, diabetes duration, minority status, income or education or insurance by period interaction, and income or education or insurance by minority status interaction. Adjusted mean estimates with 95% CI are extracted from these models with income or education or insurance modelled as a categorical variable. P-values for the association of income, education and insurance with outcomes within each time period, as well p-values for the comparison of respective associations between periods (relating to the income or education or insurance by period interaction) are extracted from these models with income or education or insurance modelled as an ordinal variable.

‡ Regression models including minority status, period, sex, age, diabetes duration, SES, minority status by period interaction, and minority status by SES interaction. Adjusted mean estimates with 95% CI are extracted from these models with minority modelled as a categorical variable P-values for the association of minority status with outcomes within each time period, as well p-values for the comparison of respective associations between periods (relating to the minority status by period interaction) are extracted from these models with minority modelled as an ordinal variable.

Models were estimated separately for the DPV and T1DX registry
