# Supplementary material
Source: publisher figshare collection journal article supplement (https://diabetesjournals.figshare.com/articles/dataset/_/12808301)
Supplement: Supplementary file 2 [file 1]

**A listing of the T1D Exchange Clinic Network sites** participating principal investigators (PI), co-investigators (I) and coordinators (C) ordered by the number of participants recruited per site as of June 1, 2017 is included below:

Syracuse, NY SUNY Upstate Medical University (n=1762) Ruth Weinstock (PI); Roberto Izquierdo (I); Umair Sheikh (I); Patricia Conboy (C); Jane Bulger (C); Suzan Bzdick (C)  
Aurora, CO Barbara Davis Center for Childhood Diabetes (n=1761) Georgeanna Klingensmith (PI); Carolyn Banion (I); Jennifer Barker (I); Cindy Cain (I); Kristen Nadeau (I); Marian Rewers (I); Arleta Rewers (I); Robert Slover (I); Andrea Steck (I); Paul Wadwa (I); Philip Zeitler (I); Guy Alonso (I); Greg Forlenza (I); Andrea Gerard-Gonzalez (I); Melanie Green (I); Susan Gross (I); Shideh Majidi (I); Laurel Messer (C); Tyler Reznick-Lipina (C); Emily Simmons (C); Katie Thivener (C); Isabel Weber (C)  
Philadelphia, PA Children's Hospital of Philadelphia (n=1666) Steven Willi (PI); Terri Lipman (I); Olena Kucheruk (C); Pantea Minnock (C); Cathy Carchidi (C); Brian Grant (C); Diana Olivos (C)  
Indianapolis, IN Riley Hospital for Children, Indiana University School of Medicine (n=1343) Linda DiMeglio (PI); Tamara Hannon (I); Carmella Evans-Molina (I); David Hansen (I); Tina Pottorff (I); Stephanie Woerner (C); Megan Hildinger (C); Robin Hufferd (C); America Newnum (C); Devyn Purtlebaugh (C); Lisa Smith (C); Kathleen Wendholt (C)  
New York City, NY Naomi Berrie Diabetes Center, Columbia University P&S (n=1272) Robin Goland (PI); Rachelle Gandica (I); Kristen Williams (I); Sarah Pollack (C); Emily Casciano (C); Julia Hochberg (C); Cecilia Uche (C)  
Ann Arbor, MI University of Michigan (n=990) Joyce Lee (PI); Brigid Gregg (I); Meng Tan (I); Lynn Ang (I); Rodica Pop-Busui (I); Inas Thomas (I); Emily Dhadphale (C); Janet Dominowski (C); Ashley Garrity (C); Virginia Leone (C); Cynthia Plunkett (C); Brittany Plunkett (C)  
Los Angeles, CA Children's Hospital Los Angeles (n=958) Roshanak Monzavi (PI); Clement Cheung (I); Lynda Fisher (I); Mimi Kim (I); Brian Miyazaki (I); Pisit Pitukcheewanont (I); Anna Sandstrom (I); Juliana Austin (I); Nancy Change (I); Jennifer Raymond (I); Brian Ichihara (C); Megan Lipton (C); Jaquelin Flores Garcia (C)  
Aurora, CO University of Colorado/Denver, Barbara Davis Center for Childhood Diabetes (n=912) Satish Garg (PI); Aaron Michels (I); Rachel Garcetti (I); Melanie Green (I); Raymond Gutin (I); Kristen Nadeau (I); Sarit Polsky (I); Viral Shah (I); Mary Voelmle (I); Lisa Myers (C); Gregory Coe (C); Jamie Demmitt (C); Yesenia Garcia Reyes (C); Dominique Giordano (C); Prakriti Joshee (C); Emily Nease (C); Nhung Nguyen (C)  
Boston, MA Children's Hospital Boston (n=873) Joseph Wolfsdorf (PI); Maryanne Quinn (I); Constance Fontanet (C); Susmita Mukherjee (C)  
Buffalo, NY University Pediatric Associates (n=868) Kathleen Bethin (PI); Teresa Quattrin (I); Indrajit Majumdar (I); Lucy Mastrandrea (I); Emily Gorman (C); Amanda House (C); Sharon Michalovic (C); Wanda Musial (C); Barbara Shine (C)  
Portland, OR Harold Schnitzer Diabetes Health Center at Oregon Health and Science University (n=860) Andrew Ahmann (PI); Jessica Castle (I); Farahnaz Joarder (I); Diana Aby-Daniel (I); Ines Guttman-Bauman (I); Bethany Klopfenstein (I); Victoria Morimoto (I); Nancy Cady (C); Rebecca Fitch (C); Donald DeFrang (C); Kristin Jahnke (C); Claire Patoine (C)  
Salt Lake City, UT University of Utah - Utah Diabetes Center (n=760) Vandana Raman (PI); Carol Foster (I); Mary Murray (I); Trina Brown (I); Cassandra Davis (C); Hillarie Slater (C); Jennifer Langvardt (C)  
Atlanta, GA Atlanta Diabetes Associates (n=743) Bruce Bode (PI); Jennifer Boyd (I); Joseph Johnson (I); Christopher Newton (I); Jonathan Ownby (I); RaShonda Hosey (C); Nitin Rastogi (C); Blake Winslett (C)  
Seattle,

WA University of Washington, Diabetes Care Center (n=694) Irl Hirsch (PI); Anthony DeSantis (I); R Alan Failor (I); Carla Greenbaum (I); Dace Trence (I); Subbulaxmi Trikudanathan (I); Dori Khakpour (C); Pam Thomson (C); Lori Sameshima (C); Corinna Tordillos (C) Kansas City, MO Children's Mercy Hospital (n=607) Mark Clements (PI); Angela Turpin (I); Ghufuran Babar (I); Julia Broussard (I); Joe Cernich (I); Kavitha Dileepan (I); Max Feldt (I); Wayne Moore (I); Tiffany Musick (I); Susana Patton (I); Yun Yan (I); Sarah Tsai (I); Jennifer Bedard (C); Aliza Elrod (C); Lois Hester (C); Marissa Beidelschies (C); Julie de la Garza (C); Emily Haith (C); Jennifer James (C); Elizabeth Ramey (C); Jessica Slover (C); Armenthia Valentine (C); Darta Watkins (C); Misty Whisenhunt (C); Jami Wiersen (C)

Stanford, CA Stanford University School of Medicine, Division of Pediatric Endocrinology (n=602) Darrell Wilson (PI); Bruce Buckingham (I); David Maahs (I); Priya Prahalad (I); Liana Hsu (C); Ryan Kingman (C); Ideen Tabatabai (C) Idaho Falls, ID Rocky Mountain Diabetes & Osteoporosis Center, PA (n=567) David Liljenquist (PI); Mark Sulik (PI); Carl Vance (PI); Jean Halford (C); Christine Funke (C) Grand Rapids, MI Helen DeVos Children's Hospital Endocrinology and Diabetes (n=565) Yaw Appiagyei-Dankah (PI); Emily Beltz (C); Karen Moran (C); Morristown, NJ BD Diabetes Center at Goryeb Children's Hospital (n=561) Harold Starkman (PI); Barbara Cerame (I); Daisy Chin (I); Laurie Ebner-Lyon (I); Kristen Sabanosh (I); Lawrence Silverman (I); Christine Wagner (I); Sunita Cheruvu (I); Marie Fox (C); Frances Melchionne (C); Minneapolis, MN International Diabetes Center/Park Nicollet Adult Endocrinology (n=552) Richard Bergenstal (PI); Marcia Madden (I); Thomas Martens (I); Amy Criego (I); Margaret Powers (I); Anders Carlson (I); Shannon Beasley (C); Beth Olson (C); LeeAnn Thomas (C); Kathleen McCann (C); Sean Dunnigan (C); Charlotte Ashanti (C); Nashville, TN Vanderbilt Eskin Diabetes Clinic (n=535) Jill Simmons (PI); William Russell (I); Sarah Jaser (I); Jennifer Kelley (I); Faith Brendle (C); Lauren Williams (C); Kimberly Savin (C); Kimberly Flowers (C); George Williams (C); Emily Hamburger (C); Angelia Davis (C); Brenna Hammel (C); New Haven, CT Yale Pediatric Diabetes Program (n=534) Eda Cengiz (PI); William Tamborlane (I); Kate Weyman (I); Michelle Van Name (I); Neha Patel (I); Jennifer Sherr (I); Eileen Tichy (I); Amy Steffen (C); Melinda Zgorski (C); Lori Carria (C); Jennifer Finnegan (C); Elvira Duran (C) Boston, MA Joslin Diabetes Center-Pediatric (n=530) Sanjeev Mehta (PI); Michelle Katz (I); Lori Laffel (I); Elisa Giani (I); Rebecca Snelgrove (I); Anat Hanono (I); Persis Commissariat (I); Julie Griffith (I); Ashley Atkins (I); Kara Harrington (I); Kenny Kim (C); Luisa Masclans (C); Nisha Naik (C); Louise Ambler-Osborn (C); Alan Schultz (C); Charlotte Cohen (C); Brittany Anderson (C); St. Louis, MO Washington University (n=527) Janet McGill (PI); Andrea Granados (I); Mary Jane Clifton (C); Stacy Hurst (C); Sarah Kissel (C); Carol Recklein (C); Detroit, MI Henry Ford Health System (n=470) Davida Kruger (PI); Arti Bhan (I); Terri Brown (I); Andreana Tassopoulos (C); Angela Hailey (C); Heather Remtema (C); Terra Cushman (C) Louisville, KY University of Louisville (n=456) Kupper Wintergerst (PI); Sara Watson (I); Suzanne Kingery (I); Lauren Rayborn (I); Heather Rush (I); Michael Foster (I); Amy Deuser (C); Manuel Rodriguez-Luna (C); Stephanie Eubanks (C) Tampa, FL University

of South Florida Diabetes Center (n=444) Henry Rodriguez (PI); Sureka Bollepalli (I); Laura Smith (I); Dorothy Shulman (I); E. Verena Jorgensen (I); Emily Eyth (C); Rachel Brownstein (C); Janet Rodriguez (C); Juanita O'Brian (C); Chicago, IL Northwestern University (n=421) Grazia Aleppo-Kacmarek (PI); Allison Hahr (I); Mark Molitch (I); El Muayed (I); Daniel Toft (I); Candice Fulkerson (C); Daphne Adelman (C); Elaine Massaro (C); Kimberly Webb (C); Los Angeles, CA University of Southern California - Community Diabetes Initiatives (n=380) Anne Peters (PI); Valerie Ruelas (C); Mark Harmel (C); Orange, CA Children's Hospital of Orange County (n=378) Mark Daniels (PI); Nikta Forghani (I); Timothy Flannery (I); Christina Reh (I); Amrit Bhangoo (I); Himala Kashmiri (I); Keirsten Montgomery (I); Lien Trinh (I); Heather Speer (C); Kristen Lane (C); Minneapolis, MN International Diabetes Center/Park Nicollet Pediatric Endocrinology (n=376) Richard Bergenstal (PI); Thomas Martens (I); Marcia Madden (I); Margaret Powers (I); Amy Criego (I); Andes Carlson (I); Beth Olson (C); Shannon Beasley (C); Kathleen McCann (C); LeeAnn Thomas (C); Cassie Miller (C); Charlotte Ashanti (C); Charlottesville, VA University of Virginia Health System (n=367) Christine Burt Solorzano (PI); Jennifer Puskaric (C); Durham, NC University of North Carolina Diabetes Care Center (n=364) Robert Benjamin (PI); Deanna Adkins (I); Amber Spruill (C); Cathy Williams (C); Iowa City, IA University of Iowa Children's Hospital (n=355) Eva Tsalikian (PI); Michael Tansey (I); Nidhi Bansl (I); Joanne Cabbage (C); Julie Coffey (C); Rachel Bisbee (C); Gainesville, FL University of Florida (n=355) Desmond Schatz (PI); Michael Clare-Salzler (I); Kenneth Cusi (I); Becky Fudge (I); Mike Haller (I); Collette Meehan (I); Henry Rohrs (I); Janet Silverstein (I); Ashby Walker (I); Anastasia Albanese-O'Niell (I); Stephanie Foss (C); Janey Adams (C); Miriam Cintron (C); Nicole Thomas (C); San Diego, CA University of California (n=353) Michael Gottschalk (PI); Ron Newfield (I); Marla Hashiguchi (C); Oklahoma City, OK University of Oklahoma Health Sciences Center Dept. of Pediatric Diabetes and Endocrinology (n=338) David Sparling (PI); Jeanie Tryggested (I); Joni Beck (I); Joane Less (C); Linda Weber (C) San Francisco, CA University of California, San Francisco Medical Center (UCSF) (n=333) Saleh Adi (PI); Stephen Gitelman (I); Srinath Sanda (I); Jenise Wong (I); Mary McDonnell (C); Monica Mueller (C); Zara Izadi (C); Swaroop Mistry (C) Greenville, SC Greenville Hospital System Pediatric Endocrinology (n=329) Bryce Nelson (PI); Lisa Looper (C); Carrie Frost (C); Houston, TX Baylor College of Medicine / Texas Children's Hospital (n=325) Maria Redondo (PI); Sarah Lyons (I); Sara Klinepeter (I); Kelly Fegan-Bohm (I); Fida Bacha (I); Daniel DeSalvo (I); Ashley Butler (I); Marisa Hilliard (I); Farida Khetani (C); Ronald Yulatic (C); Robert Hudson (C); Laura Irvine (C); Sadia Zubair (C); Cory Pace (C); Abelin Pitrello (C); Wendy Levy (C); Charity Njoku (C); Columbus, OH Central Ohio Pediatrics Endocrinology and Diabetes Services (n=318) William Zipf (PI); Jennifer Dyer (I); Rolando Lozano (I); Diane Seiple (C); Grant Corven (C); Megan Jaycox (C) Cleveland, OH University Hospitals of Cleveland (n=301) Jamie Wood (PI); Sarah Macleish (I); Rose Gubitosi-Klug (I); Ramon Adams (C); Paul McGuigan (C); Terri Casey (C); Wendy

Campbell (C); Sioux Falls, SD Avera Research Institute (n=281) Julie Kittelsrud (PI); Ashutosh Gupta (I); Vikki Peterson (C); Pittsburgh, PA Children's Hospital of Pittsburgh of UPMC (n=253) Ingrid Libman (PI); Ana Diaz (C); Tulsa, OK Harold Hamm Diabetes Center, University of Oklahoma (n=248) David Jelley (PI); Christina Crowder (C); Dana Greer (C); Julia Crawford (C); Sharnella Goudeau (C); Seattle, WA Seattle Children's Hospital (n=247) Catherine Pihoker (PI); Joyce Yi-Frazier (I); Susan Kearns (C); Michael Pascual (C); Beth Loots (C); Natalie Beauregard (C); Philadelphia, PA University of Pennsylvania Perelman School of Medicine/Rodebaugh Diabetes Center (n=236) Michael Rickels (PI); Shannon O'Brien (I); Shivani Agarwal (I); Amy Peleckis (I); Cornelia Dalton-Bakes (C); Eileen Markmann (C); Atlanta, GA Emory University (n=235) Guillermo Umpierrez (PI); Andrew Muir (I); Clementina Ramos (C); Keywan Behbahani (C); Neil Dhruv (C); Nolan Gartzman (C); Minneapolis, MN University of Minnesota (n=228) Brandon Nathan (PI); Melena Bellin (I); Muna Sunni (I); Nancy Flaherty (C); Janice Leschyshyn (C); Kara Schmid (C); Darcy Weingartner (C); Marrissa Ludwig (C); Brittney Nelson (C); Anne Kogler (C); Avery Bartyzal (C); Anne Street (C); Beth Pappenfus (C); Jessica Sweet (C) Durham, NC University of North Carolina Diabetes Care Center (n=194) John Buse (PI); Laura Young (I); Katherine Bergamo (I); April Goley (I); Marian Kirkman (I); Jamie Diner (C); Alex Kass (C); Milana Dezube (C); Ocean Springs, MS The Diabetes Center, PLLC (n=190) Kathleen Arnold (PI); Traci Evans (I); Sharon Sellers (C); Baltimore, MD Johns Hopkins University Pediatric Endocrinology (n=190) Scott Blackman (PI); Kimber-Lee Abel (C); Lisa Rasbach (C); Milwaukee, WI The Medical College of Wisconsin/ Children's Hospital of WI (n=188) Omar Ali (PI); Peter Wolfram (I); Rosanna Fiallo-Sharer (I); Joanna Kramer (C); Christina Beesley (C); Clare Bingham-Tyson (C); Rachel Unteutsch (C); Worcester, MA University of Massachusetts Medical School (n=185) David Harlan (PI); Mary Lee (I); Leslie Soyka (I); Penny Feldman (I); Michael Thompson (I); Karen Gallagher-Dorval (C); Lisa Hubacz (C); Celia Hartigan (C); Carol Ciccarelli (C); Rapid City, SD Regional Health Clinical Research (n=183) Rachel Edelen (PI); Michelle Edelen (I); Trista Borgwadt (C); Kirstin Stauffacher (C); Kelly DeGrote (C); Crystal Gruetzmacher (C); Michael Shepperd (C); Des Moines, IA Iowa Diabetes and Endocrinology Research Center (n=182) Anuj Bhargava (PI); Diana Wright (I); Kathleen Fitzgerald (I); Teck Khoo (I); Natalie Young (C); Lisa Borg (C); Kirstie Stifel (C); Cindy Rail (C); Sioux Falls, SD Sanford Research/USD (n=180) Luis Casas (PI); Elizabeth Eidenshink (C); Christina Huber (C); Alex Rieder (C); Amy Tuchscherer (C); Megan Broadbent (C); Cincinnati, OH Cincinnati Children's Hospital Medical Center (n=174) Lawrence Dolan (PI); Sarah Corathers (I); Jessica Kichler (I); Nicole Sheanon (I); Holly Baugh (C); Debbie Standiford (C); Tammy Weis (C); Catherine Fox (C); Carrie Schultz (C); Amy Ritter (C); Miami, FL University of Miami, Diabetes Research Institute (n=167) Francesco Vendrame (PI); Carlos Blashke (C); Della Matheson (C); Natalia Sanders-Branca (C); Billings, MT St. Vincent Healthcare/Internal Medicine and Diabetes (n=166) Justen Rudolph (PI); Doris Biersdorf (C); Jane Fitch-Danielson (C); Nashville, TN

Vanderbilt Eskind Diabetes Clinic (n=166) Dara Eckerle-Mize (PI); Faith Brendle (C); Janet Fry (C); Dianne Davis (C); Cynthia Lovell (C); Brenna Hammel (C); Lauren Williams (C); Columbus, OH The Research Institute at Nationwide Children's Hospital (n=166) Robert Hoffman (PI); Monika Chaudhari (I); Manmohan Kamboj (I); Lindsey Carr (C); Bismarck, ND Medcenter One (n=156) Luis Casas (PI); Julie Blehm (I); Anthony Tello (I); Julie Ann Walter (C); Rhonda Ward (C); Megan Broadbent; Billings MT Billings Clinic Hospital (n=135) Gabriel Blomquist (PI); Maria Stewart (I); Paige Cross (C); Sarah Racki (C); Lindsey Sterchi (C); Diane Gouine (C); Becky Kiesow (C); Stephanie Welch (C); San Diego, CA Scripps Whittier Diabetes Institute (n=130) Athena Philis-Tsimikas (PI); George Daily (I); Amy Chang (I); James McCallum (I); Isabel Garcia (C); Teresa Vela (C); Ioanna Loupasi (C); Rosario Rosal (C); Boston, MA Joslin Diabetes Center – Adult (n=129) Elena Toschi (PI); Roeland Middelbeek (I); Medha Munshi (I); Christine Slyne (C); Astrid Atakov-Castillo (C); Jacksonville, FL Nemours Children's Clinic (n=129) Larry Fox (PI); Nelly Mauras (I); Rachel Wasserman (I); Ligeia Damaso (C); Kim Englert (C); Kaitlin Sikes (C); Kim Ponthieux (C); Chicago, IL The University of Chicago (n=117) Louis Phillipson (PI); Ashley Cohen (C); Gail Gannon (C); Tallahassee, FL Tallahassee Memorial Diabetes Center (n=109) Larry Deeb (PI); April Shiver (C); Findlay, OH Blanchard Valley Medical Associates (n=103) Leroy Schroeder (PI); Wendi Schworm (I); Kristina Graham (C); New York, NY Mt Sinai Diabetes Center (n=85) Carol Levy (PI); David Lam (I); Elizabeth Burtman (I); Camilla Levister (C); Selassie Ogyaadu (C); Vallejo, CA Kaiser Permanente (n=78) Heidi Gassner (PI); Julie Duke (C); Phoenix, AZ Phoenix Children's Hospital (n=76) Leslie Touger (PI); Dorothee Newbern (I); Francine Hoekstra (C); Paterson, NJ St. Joseph's Children's Hospital (n=65) Katerina Harwood (PI); Vijaya Prasad (I); JoAnne Daguanno (C); Orlando, FL Florida Hospital (n=58) Richard Pratley (PI); Karen Corbin (I); Mia Wright (C); Susann Nagel (C); Natasha Water (C); Matthew Ghere (C); Keri Whitaker (C); New York, NY Children's Hospital at Montefiore (n=48) Rubina Heptulla (PI); Ranjitha Katikaneni (C); Doreen Johnson-Newell (C); New York, NY Albert Einstein College of Medicine (n=44) Jill Crandall (PI); Danielle Powell (C); Valentin Anghel (C); Hackensack, NJ Joseph M. Sanzari Children's Hospital (n=24) Steven Ghanny (PI); Javier Aisenberg (I); Amy Chartoff (I); Jennifer Sivitz (I); Susan Mathus (C); Toni-Lyn Cospito (C); Lexington, KY UK Healthcare University of Kentucky (n=18) Kathryn Thailkill (PI); John Fowlkes (I); Evangelia Kalaitzoglou (I); Alba Morales Pozzo (I); Kathy Edwards (C)

### **A listing of the DPV sites**

Aachen - Uni-Kinderklinik RWTH, Aalen Kinderklinik, Ahlen St. Franziskus Kinderklinik, Altötting-Burghausen Innere Medizin, Amberg Kinderklinik St. Marien, Arnsberg-Hüsten Karolinenhosp. Kinderabteilung, Aue Helios Kinderklinik, Augsburg IV. Med. Klinik, Augsburg Josefinum Kinderklinik, Augsburg Kinderklinik Zentralklinikum, Aurich Kinderklinik, Bad Aibling Internist. Praxis, Bad Hersfeld Kinderklinik, Bad Kreuznach

Diakonie Kikli, Bad Kreuznach-Viktoriastift, Bad Kösen Median Kinderklinik, Bad Lauterberg Diabeteszentrum Innere, Bad Mergentheim - Diabetesfachklinik, Bad Mergentheim - Kinderdiabetologische Praxis, Bad Oeynhausen Herz-und Diabeteszentrum NRW, Bad Orb Spessart Klinik, Bad Orb Spessart Klinik Reha, Bad Reichenhall Kreisklinik Innere Med., Bad Salzungen Kinderklinik, Bad Waldsee Kinderarztpraxis, Bautzen Oberlausitz KK, Bayreuth Innere Medizin, Berchtesgaden CJD, Berchtesgaden CJD-Beruf.REHA, Bergen Gemeinschaftspraxis, Berlin DRK-Kliniken Pädiatrie, Berlin Endokrinologikum, Berlin Klinik St. Hedwig Innere, Berlin Lichtenberg - Kinderklinik, Berlin Virchow-Kinderklinik, Bielefeld Kinderarztpraxis, Bielefeld Kinderklinik Gilead, Bocholt Kinderklinik, Bochum Universitäts St. Josef, Bochum Universitätskinderklinik St. Josef, Bonn Uni-Kinderklinik, Bottrop Knappschaftskrankenhaus Innere, Braunschweig Kinderarztpraxis, Bremen - Kinderklinik Nord, Bremen Zentralkrankenhaus Kinderklinik, Bremerhaven Kinderklinik, Bruchweiler Edelsteinklinik Kinder-Reha, Böblingen Kinderklinik, Castrop-Rauxel Rochus-Hospital, Celle Klinik für Kinder- und Jugendmedizin, Chemnitz Kinderklinik, Coburg Innere Medizin, Coburg Kinderklinik, Coesfeld Kinderklinik, Darmstadt Innere Medizin, Darmstadt Kinderklinik Prinz. Margaret, Datteln Vestische Kinderklinik, Deggendorf Gemeinschaftspraxis, Deggendorf Medizinische Klinik II, Deggendorf Pädiatrie-Praxis, Delmenhorst Kinderklinik, Dessau Kinderklinik, Detmold Kinderklinik, Dinslaken Kinderklinik, Dortmund Kinderklinik, Dortmund Medizinische Kliniken Nord, Dortmund-Hombruch Marienhospital, Dortmund-St. Josefshospital Innere, Dortmund-West Innere, Dresden Neustadt Kinderklinik, Dresden Uni-Kinderklinik, Duisburg Malteser Rhein-Ruhr St. Anna Innere, Duisburg Sana Kinderklinik, Duisburg-Huckingen, Duisburg-Huckingen Malteser Rhein-Ruhr ST. Johannes, Duisburg-St.Johannes Helios, Düren-Birkedorf Kinderklinik, Düsseldorf Uni-Kinderklinik, Eisleben Lutherstadt Helios-Klinik, Erfurt Kinderklinik, Erlangen Uni-Kinderklinik, Essen Diabetes-Schwerpunktpraxis, Essen Elisabeth Kinderklinik, Essen Kinderarztpraxis, Essen Uni-Kinderklinik, Esslingen Klinik für Kinder und Jugendliche, Eutin Kinderklinik, Filderstadt Kinderklinik, Flensburg Diakonissen Kinderklinik, Forchheim Diabeteszentrum SPP, Frankenthal Kinderarztpraxis, Frankfurt Diabeteszentrum Rhein-Main-Erwachsenendiabetologie (Bürgerhospital), Frankfurt Diabeteszentrum Rhein-Main-pädiat. Diabetologie (Clementine-Hospital), Frankfurt Uni-Kinderklinik, Frankfurt Uni-Klinik Innere, Frankfurt Uni-Klinik Innere2, Freiburg Kinder-MVZ, Freiburg St. Josef Kinderklinik, Freiburg Uni Innere, Freiburg Uni-Kinderklinik, Fulda Kinderklinik, Fürth Kinderklinik, Gaissach Fachklinik der Deutschen Rentenversicherung Bayern Süd, Garmisch-Partenkirchen Kinderklinik, Geislingen Klinik Helfenstein Innere, Gelnhausen Kinderklinik, Gelsenkirchen Kinderklinik Marienhospital, Gera Kinderklinik, Gießen Uni-Kinderklinik, Gmmersbach Oberbergklinikum, Greifswald Uni-Kinderklinik, Göppingen Kinderklinik am Eichert, Görlitz Städtische Kinderklinik, Göttingen Uni-Kinderklinik, Hachenburg Kinderpraxis, Hagen Kinderklinik, Halberstadt Kinderklinik AMEOS, Halle Uni-

Kinderklinik, Hamburg Altonaer Kinderklinik, Hamburg Endokrinologikum, Hamburg Kinderklinik Wilhelmstift, Hamburg-Nord Kinder-MVZ, Hameln Kinderklinik, Hamm Kinderklinik, Hanau Kinderklinik, Hanau diabetol. Schwerpunktpraxis, Hannover Kinderklinik MHH, Hannover Kinderklinik auf der Bult, Haren Kinderarztpraxis, Heide Kinderklinik, Heidelberg St. Josefskrankenhaus, Heidelberg Uni-Kinderklinik, Heidenheim Kinderklinik, Heilbronn Innere Klinik, Heilbronn Kinderklinik, Herdecke Kinderarztpraxis, Herdecke Kinderklinik, Herford Kinderarztpraxis, Herford Klinikum Kinder & Jugendliche, Heringsdorf Inselklinik, Herne Evan. Krankenhaus Innere, Herten St. Elisabeth Innere Medizin, Hildesheim Bernward Krks Kinderheilkunde, Hildesheim GmbH - Innere, Hildesheim Kinderarztpraxis, Hof Kinderklinik, Hohenmölsen Diabeteszentrum, Homburg Uni-Kinderklinik Saarland, Iserlohn Innere Medizin, Itzehoe Kinderklinik, Jena Kinderarztpraxis, Jena Uni-Kinderklinik, Kaiserslautern Kinderarztpraxis, Kaiserslautern-Westpfalzlinikum Kinderklinik, Karlsburg Klinik für Diabetes & Stoffwechsel, Karlsruhe Städtische Kinderklinik, Kassel Klinikum Kinder- und Jugendmedizin, Kaufbeuren Kinderklinik, Kempten Oberallgäu Kinderklinik, Kiel Städtische Kinderklinik, Kiel Universitäts-Kinderklinik, Kirchen DRK Krankenhaus Kinderklinik, Kirchheim-Nürtingen Innere, Kleve Innere Medizin, Koblenz Kemperhof 1. Med. Klinik, Koblenz Kinderklinik Kemperhof, Konstanz Kinderklinik, Krefeld Kinderklinik, Kreischa-Zscheckwitz Klinik Bavaria, Köln Kinderklinik Amsterdamerstrasse, Köln Uni-Kinderklinik, Landau Innere, Landshut Kinderklinik, Lappersdorf Kinderarztpraxis, Leer Klinikum - Klinik Kinder & Jugendmedizin, Leipzig Uni-Kinderklinik, Leverkusen Kinderklinik, Limburg Innere Medizin, Lingen Kinderklinik St. Bonifatius, Lippstadt Evangelische Kinderklinik, Ludwigsburg Kinderklinik, Ludwigshafen Kinderklinik St. Anna-Stift, Ludwigshafen diabetol. SPP, Lübeck Uni-Kinderklinik, Lübeck Uni-Klinik Innere Medizin, Lüdenscheid Hilfswerk Kinder & Jugendliche, Lüdenscheid Märkische Kliniken - Kinder & Jugendmedizin, Magdeburg Ki-Klinik St. Marienstift, Magdeburg Städtisches Klinikum Innere, Magdeburg Uni-Kinderklinik, Mainz Uni-Kinderklinik, Mannheim Uni-Kinderklinik, Marburg - UKGM Endokrinologie & Diabetes, Marburg Uni-Kinderklinik, Marktredwitz Innere Medizin, Mechernich Kinderklinik, Meissen Kinderklinik Elblandklinikum, Memmingen Internistische Praxis, Memmingen Kinderklinik, Minden Kinderklinik, Moers Kinderklinik, Murnau am Staffelsee - diabetol. SPP, Mutterstadt Kinderarztpraxis, Mönchengladbach Kinderklinik Rheydt Elisabethkrankenhaus, Mühldorf am Inn Kinderarztpraxis, München 3. Orden Kinderklinik, München Diabetes-Zentrum Süd, München Kinderarztpraxis diabet. SPP, München Praxiszentrum Saarstrasse, München von Haunersche Kinderklinik, München-Gauting Kinderarztzentrum, München-Harlaching Kinderklinik, München-Schwabing Kinderklinik, Münster Herz Jesu Innere, Münster Ludgerus-Kliniken GmbH, Münster St. Franziskus Kinderklinik, Münster Uni-Kinderklinik, Münster pädiat. Schwerpunktpraxis, Nauen Havellandklinik, Neuburg Kinderklinik, Neumarkt Innere, Neunkirchen Gemeinschaftspraxis Kinderheilkunde, Neunkirchen Marienhausklinik Kohlhof

Kinderklinik, Neuruppin Kinderklinik, Neuss Lukas-Krankenhaus Kinderklinik, Neuss Lukaskrankenhaus Kinderklinik, Neuwied Kinderklinik Elisabeth, Neuwied Marienhaus Klinikum St. Elisabeth Innere, Nürnberg Cnopfsche Kinderklinik, Nürnberg Zentrum f Neugeb./Kinder & Jugendl., Oberhausen Innere, Oberhausen Kinderklinik, Oberhausen Kinderpraxis, Oberhausen St.Clemens Hospitale Sterkrade, Oberndorf Gastroenterologische Praxis Schwerpunkt Diabetologie, Offenbach/Main Innere Medizin, Offenbach/Main Kinderklinik, Offenburg Kinderklinik, Oldenburg Kinderklinik, Oldenburg Schwerpunktpraxis Pädiatrie, Olpe pädiatrische Gemeinschaftspraxis, Osnabrück Christliches Kinderhospital, Paderborn St. Vincenz Kinderklinik, Papenburg Marienkrankenhaus Kinderklinik, Passau Kinderarztpraxis, Passau Kinderklinik, Pforzheim Kinderklinik, Pfullendorf Innere Medizin, Pirmasens Städtisches Krankenhaus Innere, Plauen Vogtlandklinikum, Ravensburg Kinderklinik St. Nikolaus, Regensburg Kinderklinik St. Hedwig, Rendsburg Kinderklinik, Reutlingen Kinderarztpraxis, Reutlingen Kinderklinik, Rheine Mathiasspital Kinderklinik, Rosenheim Innere Medizin, Rosenheim Kinderklinik, Rosenheim Schwerpunktpraxis, Rostock Uni-Kinderklinik, Rotenburg/Wümme Agaplesion Diakonieklinikum Kinderabteilung, Rüsselsheim Kinderklinik, Saaldorf-Surheim Diabetespraxis, Saalfeld Thüringenklinik Kinderklinik, Saarbrücken Kinderklinik Winterberg, Saarlouis Kinderklinik, Scheidegg Prinzregent Luitpold, Schleswig Heliosklinik Kinderklinik, Schw. Gmünd Stauferklinik Kinderklinik, Schweinfurt Kinderklinik, Schwerin Innere Medizin, Schwerin Kinderklinik, Schwäbisch Hall Diakonie Kinderklinik, Siegen Kinderklinik, Singen - Hegauklinik Kinderklinik, Singen Kinderarztpraxis, Spaichingen Innere, Speyer Diakonissen Stiftungs Krankenhaus Pädiatrie, St. Augustin Kinderklinik, Stade Kinderklinik, Stolberg Kinderklinik, Stuttgart Olgahospital Kinderklinik, Suhl Kinderklinik, Sylt Rehaklinik, Tettnang Innere Medizin, Traunstein Kinderklinik, Traunstein diabetol. Schwerpunktpraxis, Trier Kinderklinik der Borromäerinnen, Trostberg Innere, Tübingen Uni-Kinderklinik, Ulm Endokrinologikum, Ulm Endokrinologikum Amedes, Ulm Schwerpunktpraxis Bahnhofsplatz, Ulm Uni-Kinderklinik, Vechta Kinderklinik, Viersen Kinderkrankenhaus St. Nikolaus, Villingen-Schwenningen Schwarzwald Baar Klinikum Kinderklinik, Villingen-Schwenningen Schwarzwald-Baar-Klinikum Innere, Waldshut Kinderpraxis, Waldshut-Tiengen Kinderpraxis Biberbau, Waren-Müritz Kinderklinik, Weiden Kinderklinik, Weingarten Kinderarztpraxis, Weisswasser Kreiskrankenhaus, Wernberg-Köblitz SPP, Werningerode MVZ, Wesel Marienhospital Kinderklinik, Wiesbaden Helios Horst-Schmidt-Kinderkliniken, Wiesbaden Kinderklinik DKD, Wilhelmshaven Klinikum Kinderklinik, Winnenden Rems-Murr Kinderklinik, Wismar Kinderklinik, Wittenberg Innere Medizin, Wittenberg Kinderklinik, Worms - Weierhof, Worms Kinderklinik, Wuppertal Kinderklinik, Würzburg Kinderarztpraxis, Zweibrücken Kinderarztpraxis,
